# Supplementary material for: An efficient and eco-friendly method for the thiol-Michael addition in aqueous solutions using amino acid ionic liquids (AAILs) as organocatalysts
Source: publisher site journal article supplement (doi:10.1515/pac-2019-0212), 2019-09-04
Supplement: Supplementary file 1 [file pac-2019-0212_suppl.docx]

**SUPPORTING INFORMATION**

**An efficient and eco-friendly method for the thiol-Michael addition in aqueous solutions using amino acid ionic liquids (AAILs) as organocatalysts.**

Roberto Figueroa Guíñez,1 José G. Santos, 1 Ricardo A. Tapia, 1 Jackson J. Alcazar, 1 Margarita E. Aliaga1,* and Paulina Pavez.1,*

1Facultad de Química y de Farmacia, Pontificia Universidad Católica de Chile, Casilla 306, Santiago 6094411, Chile.

**Author Information**

*Corresponding authors. Tel.: +56-02-23541743; fax: +56-02-26864744; e-mail: **mealiaga@uc.cl and** **ppavezg@uc.cl**

| **Table of Contents** | **Page** |
| --- | --- |
| **Scheme S1.** Synthesis of amino acid ionic liquids (Bmim[AA]s) | S3 |
| Characterization data of Bmim[AA]s. | S3 |
| **Synthesis and characterization of Michael adduct** | S4 |
| **Fig. S1**. 1H NMR spectrum of Michael adduct between **1** and L-Cys in DMSO-*d*6. | S5 |
| **Fig. S2**. 13C NMR spectrum of Michael adduct between **1** and L-Cys in DMSO-*d*6. | S5 |
| **Fig. S3.** Dept-135 NMR spectrum of Michael adduct between **1** and L-Cys in DMSO-*d*6. | S6 |
| **Fig. S4**. **(a)** Proposed Michael adducts A and B. The dashed arrow indicates the correlation by HMBC NMR spectrum. **(b)** HMQC spectrum of Michael adduct between **1** and L-Cys in DMSO-*d*6. | S7 |
| **Fig. S5.** HRMS-ESI spectrum of Michael adduct synthesized. | S8 |
| **Product determination** | S8 |
| **Fig. S6**. HRMS-ESI spectrum of Michael adduct using Bmim[His] as catalyst under our kinetics experimental conditions. | S8 |
| **Fig. S7**. HRMS-ESI spectrum of Michael adduct using Bmim[Ser] as catalyst under our kinetics experimental conditions. | S9 |
| **Fig. S8**. HRMS-ESI spectrum of Michael adduct using Bmim[Phe] as catalyst under our kinetics experimental conditions. | S9 |
| **Fig. S9**. HRMS-ESI spectrum of Michael adduct using Bmim[Ala] as catalyst under our kinetics experimental conditions. | S10 |
| **Table S1**. Pseudo-first-order rate constants (*k*obsd) for the reaction of **1** (5×10-6 M) with L-Cys (5×10-5-5.5×10-3 M) at 25 ± 0.1ºC. | S10 |
| **Table S2**. Pseudo-first-order rate constants (*k*obsd) for the reaction of **1** (5×10-5 M) with L-Cys (5×10-4 M) using Bmim[AA]s (5×10-6-3×10-5 M) as catalyst at 25 ± 0.1ºC. | S11 |
| **Table S3.** Pseudo-first-order rate constant (*k*obsd) for the reaction of **1** with L-Cys at 9-32ºC temperature range. | S12 |
| **Table S4.** Catalytic (*k*cat) and nucleophilic (*k*N) rate constants for the reaction of **1** with L-Cys at 9-32ºC temperature range. | S13 |
| **Table S5.** The *k*obsd values obtained in each cycle for thiol-Michael reaction between **1** (5×10-5 M) and L-Cys (7×10-4 M) and Bmim[AA]s (2.5×10-5 M) as catalyst at 25 ± 0.1°C. | S13 |
| **Table S6.** Nucleophilic rate constant of thiolate (M-1s-1) of the reaction between **1** and L-Cys and L-cysteine derivatives (5×10-4 M) as control in pH: 5.5 at 25 ± 0.1°C. | S13 |
| **Table S7.** Pseudo-first-order rate constants (*k*obsd) for the reaction of **1** (5×10-5 M) with L-Cys (5×10-4 M) over a pH range of 5.4-6.3 at 25ºC ± 0.1. | S14 |

**Scheme S1.** Synthesis of amino acid ionic liquids.

**Characterization data of Bmim[AA]s.**

**1-Butyl-3-methylimidazolium alanine** (Bmim[Ala]) Obtained as light-yellow oil in 96% yield. 1H NMR (400 MHz, DMSO-d6) δ 9.82 (s, 1H), 7.88 (s, 1H), 7.81 (s, 1H), 4.20 (t, *J* = 7.2 Hz, 2H), 3.89 (s, 3H), 2.92 (q, *J* = 6.8 Hz, 1H), 1.82 – 1.67 (m, 2H), 1.29 – 1.16 (m, 2H), 1.04 (d, *J* = 6.9 Hz, 3H), 0.86 (t, *J* = 7.4 Hz, 3H); NH2 may appear as very broad signal around 1.5 ppm. 13C NMR (400 MHz, DMSO-d6) δ, ppm: 13.7; 19.2; 23.0; 31.9; 36.0; 48.8; 52.0; 122.7; 124.0; 137.8; 179.2. HRMS-ESI (+ mode): found m/z 139.1229; calculated for cation C8H15N2 m/z 139.1230 (Δ= 0.7 ppm)

**1-Butyl-3-methylimidazolium proline** (Bmim[Pro]) Obtained as light-yellow oil in 94% yield. 1H-RMN (400 MHz, DMSO-d6) δ, ppm: 9,71 (s, 1H), 7,88 (s, 1H), 7,80 (s, 1H), 4,20 (t, *J* = 7,1 Hz, 2H), 3,88 (s, 3H), 3,03 – 2,92 (m, 1H), 2,70 (s, 1H), 1,84 (dd, *J* = 11,5, 8,2 Hz, 1H), 1,78 – 1,64 (m, 4H), 1,63 – 1,41 (m, 2H), 1,30 – 1,14 (m, 2H), 0,86 (t, *J* = 7,3 Hz, 3H). 13C-RMN (400 MHz, DMSO-d6) δ, ppm: 176,0, 137,7, 124,0, 122,7, 62,1, 48,9, 46,8, 36,0, 31,9, 31,0, 25,8, 19,2, 13,7. HRMS-ESI (+ mode): found m/z 139.1225; calculated for cation C8H15N2 m/z 139.1230 (Δ= 3.6 ppm)

**1-Butyl-3-methylimidazolium phenylalanine** (Bmim[Phe]) Obtained as light-yellow oil, 95% yield. 1H NMR (400 MHz, DMSO-d6) δ 9.88 (s, 1H), 7.90 (s, 1H), 7.85 (s, 1H), 7.27 – 6.93 (m, 5H), 4.19 (t, *J* = 7.1 Hz, 2H), 3.87 (s, 3H), 3.19 (dd, *J* = 8.4, 3.6 Hz, 1H), 3.05 (dd, *J* = 13.2, 3.8 Hz, 1H), 2.53 (dd, *J* = 13.0, 8.7 Hz, 1H), 1.83 – 1.56 (m, 2H), 1.31 – 1.06 (m, 2H), 0.81 (t, *J* = 7.3 Hz, 3H); NH2 may appear as very broad signal around 1.5 ppm. 13C NMR (400 MHz, DMSO-d6) δ, ppm: 13.2; 18.7; 31.5; 35.5; 42.2; 48.3; 58.0; 122.2; 123.5; 125.3; 127.7; 129.2; 137.2; 140.9; 177.2. HRMS-ESI (+ mode): found m/z 139.1229; calculated for cation C8H15N2 m/z 139.1230 (Δ= 0.7 ppm)

**1-Butyl-3-methylimidazolium Histidine** (Bmim[His]) Obtained as light-yellow in 97% yield. 1H-RMN (400 MHz, DMSO-d6) δ, ppm: 9,62 (s, 1H), 7,83 (s, 1H), 7,76 (s, 1H), 7,44 (s, 1H), 6,68 (s, 1H), 4,16 (t, *J* = 7,1 Hz, 2H), 3,85 (s, 3H), 3,17 (dd, *J* = 8,7, 3,6 Hz, 1H), 2,94 (dd, *J* = 14,3, 3,5 Hz, 1H), 2,46 (dd, *J* = 14,2, 8,8 Hz, 1H), 1,84 – 1,56 (m, 2H), 1,33 – 1,05 (m, 2H), 0,82 (t, *J* = 7,3 Hz, 3H); NH2 may appear as very broad signal around 1.5 ppm. 13C-RMN (400 MHz, DMSO-d6) δ, ppm: 177,8, 137,0, 134,4, 123,5, 122,2, 56,6, 48,3, 35,5, 33,4, 31,4, 18,7, 13,1. HRMS-ESI (+ mode): found m/z 139.1229; calculated for cation C8H15N2 m/z 139.1230 (Δ= 0.7 ppm)

**1-Butyl-3-methylimidazolium serine** (Bmim[Ser]) Obtained as light-yellow oil in 95% yield. 1H NMR (400 MHz, DMSO-d6) δ, ppm: 9.43 (s, 1H), 7.80 (s, 1H), 7.74 (s, 1H), 4.17 (t, *J* = 7.2 Hz, 2H), 3.86 (s, 3H), 3.39 – 3.27 (m, 2H), 2.93 (t, *J* = 6.8 Hz, 1H), 1.82 – 1.70 (m, 2H), 1.32 – 1.17 (m, 2H), 0.89 (t, *J* = 7.4 Hz, 3H). NH2 may appear as very broad signal around 1.5 ppm and OH may appear as very broad signal around 1.5-4.0 ppm. 13C NMR (400 MHz, dmso-d6) δ, ppm: 13.3, 18.8, 31.5, 35.7, 48.5, 56.4, 64.8, 122.3, 123.6, 137.0, 175.8. HRMS-ESI (+ mode): found m/z 139.1230; calculated for cation C8H15N2 m/z 139.1230 (Δ= 0 ppm)

**1-Butyl-3-methylimidazolium glycine** (Bmim[Gly]) Obtained as light-yellow oil in 95% yield. 1H NMR (400 MHz, DMSO-d6) δ 9.79 (s, 1H), 7.87 (s, 1H), 7.80 (s, 1H), 4.20 (t, *J* = 7.1 Hz, 2H), 3.88 (s, 3H), 2.73 (s, 1H), 1.75 (p, *J* = 7.2 Hz, 2H), 1.21 (dt, *J* = 14.4, 7.3 Hz, 2H), 0.87 (t, *J* = 7.3 Hz, 3H). NH2 may appear as very broad signal around 1.5 ppm and OH may appear as very broad signal around 1.5-4.0 ppm. 13C NMR (400 MHz, dmso-d6) δ 175.61, 137.32, 123.57, 122.26, 48.35, 46.53, 35.59, 31.44, 18.77, 13.27. HRMS-ESI (+ mode): found m/z 139.1230; calculated for cation C8H15N2 m/z 139.1230 (Δ= 0 ppm)

**1-Butyl-3-methylimidazolium methionine** (Bmim[Met]) Obtained as light-yellow oil in 96% yield. 1H NMR (400 MHz, DMSO-d6) δ 9.73 (s, 1H), 7.85 (t, *J* = 1.6 Hz, 1H), 7.78 (s, 1H), 4.19 (t, *J* = 7.1 Hz, 2H), 3.88 (s, 3H), 2.86 (dd, *J* = 7.9, 4.6 Hz, 1H), 2.45 (d, *J* = 7.9 Hz, 2H), 1.98 (s, 2H), 1.83 – 1.70 (m, 3H), 1.46 (dq, *J* = 15.1, 7.6 Hz, 1H), 1.24 (h, *J* = 7.4 Hz, 2H), 0.88 (t, *J* = 7.4 Hz, 3H). NH2 may appear as very broad signal around 1.5 ppm and OH may appear as very broad signal around 1.5-4.0 ppm. 13C NMR (400 MHz, dmso-d6) δ 177.55, 137.73, 124.02, 122.70, 56.04, 48.83, 36.54, 36.07, 31.90, 31.41, 19.24, 15.15, 13.73. HRMS-ESI (+ mode): found m/z 139.1230; calculated for cation C8H15N2 m/z 139.1230 (Δ= 0 ppm)

**1-Butyl-3-methylimidazolium asparagine** (Bmim[Asn]) Obtained as light-yellow oil in 97% yield. 1H NMR (400 MHz, DMSO-d6) δ 9.65 (s, 1H), 7.94 (s, 1H), 7.84 (d, *J* = 1.7 Hz, 1H), 7.77 (d, *J* = 1.8 Hz, 1H), 6.71 (s, 1H), 4.18 (t, *J* = 7.2 Hz, 2H), 3.14 (dd, *J* = 9.0, 4.1 Hz, 1H), 2.57 – 1.89 (m, 2H), 1.74 (p, *J* = 7.3 Hz, 2H), 1.22 (h, *J* = 7.3 Hz, 2H), 0.97 – 0.77 (m, 3H). 13C NMR (50 MHz, DMSO-*d*6) δ 176.72, 174.77, 137.11, 123.51, 122.18, 53.64, 48.32, 42.50, 35.56, 31.36, 18.71, 13.20. HRMS-ESI (+ mode): found m/z 139.1231; calculated for cation C8H15N2 m/z 139.1230 (Δ= 0.7 ppm)

**Synthesis and characterization of Michael adduct.**

A solution of L-Cys (87 mg, 7.2x10-4 mole) in 1.2 mL water was added dropwise to a solution of *trans*-β-nitrostyrene(107 mg, 7.2x10-4 mole) in 2 mL acetonitrile at 0°C. Then, the reaction mixture was stirred at room temperature for 30 minutes and the resulting precipitate was collected by filtration and washed with cold methanol. Recrystallization from methanol-water (1:1) afforded 121 mg (62.2%) of Michael adduct. Melting Point 182-184°C

**Fig. S1**: 1H NMR spectrum of Michael adduct between **1** and L-Cys in DMSO-*d*6.

**Fig. S2**. 13C NMR spectrum of Michael adduct between **1** and L-Cys in DMSO-*d*6.

**Fig. S3.** Dept-135 NMR spectrum of Michael adduct between **1** and L-Cys in DMSO-*d*6.


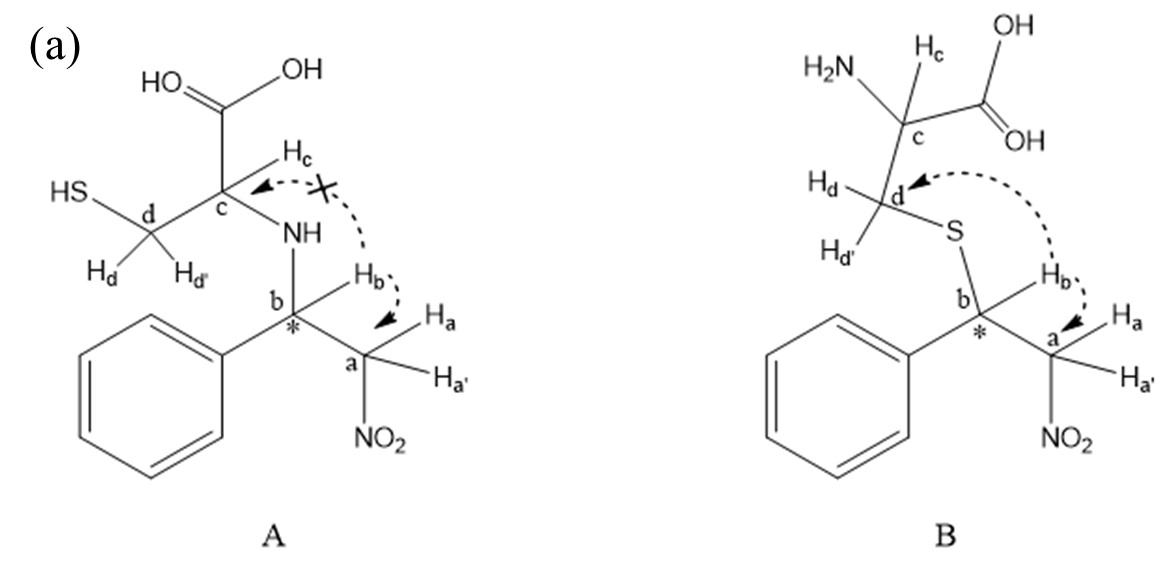


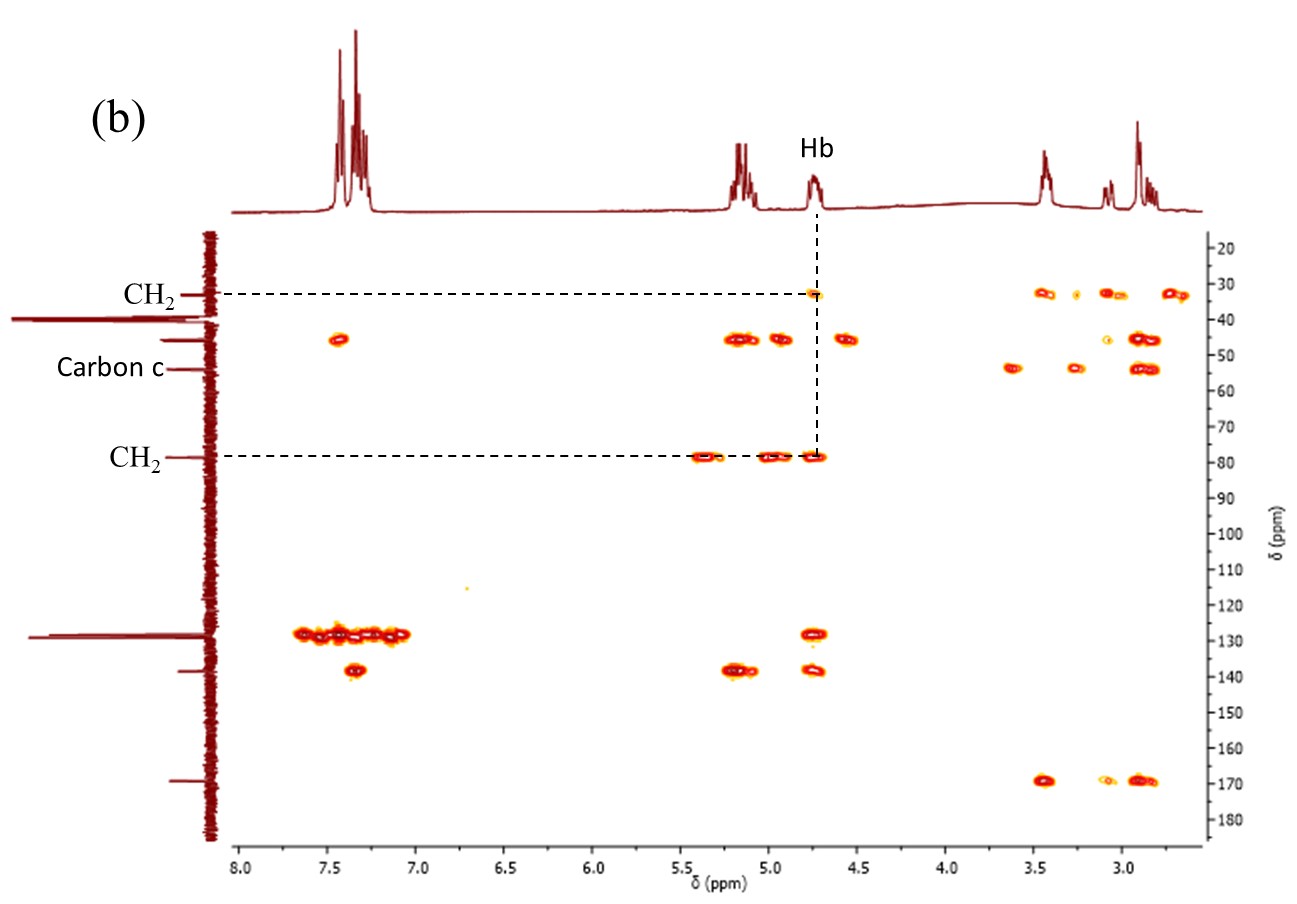


**Fig. S4. (a)** Proposed Michael adducts **A** and **B**. The dashed arrow indicates the correlation by HMBC NMR spectrum. **(b)** HMBC NMR spectrum of Michael adduct between **1** and L-Cys in DMSO-*d*6.


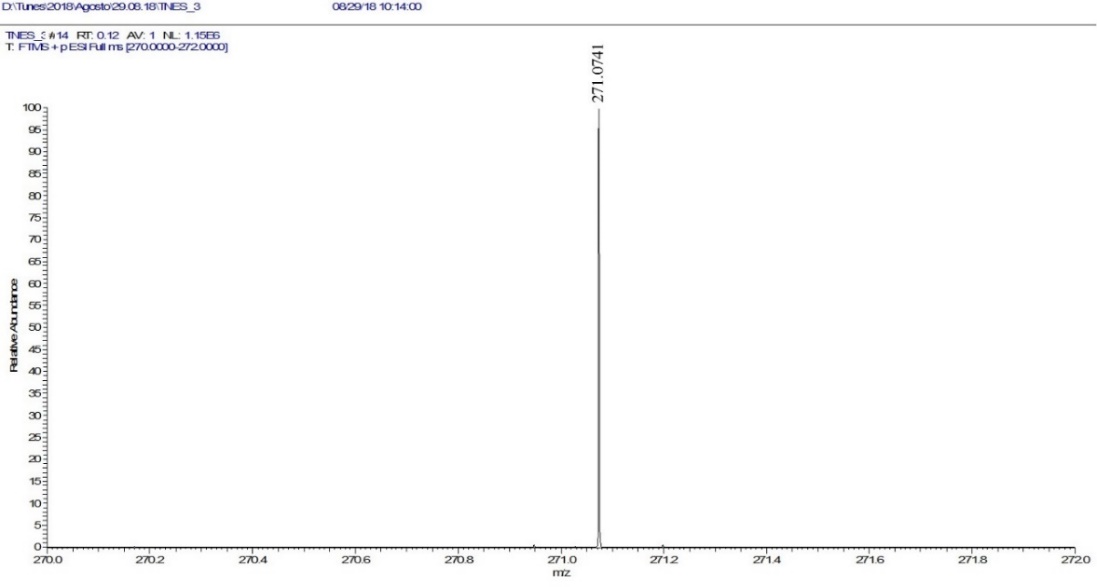


**Fig. S5**. HRMS-ESI spectrum of Michael adduct [M+H]+ at m/z 271.0741.

**Product determination.**

The Michael adduct was characterized by HRMS at the end of the reactions of **1** with L-cysteine in the same kinetic conditions using four different Bmim[AA]s (see Fig. S6-S9). The scan parameters: Resolution: 140000, AGC target: 1e 6, Max. inject time: 200 HESI source: Sheath gas flow: 30, Aux gas flow rate: 3, Sweep gas flow rate: 0, Capillary temp.: 250°C, S-lens RF level: 0, Heater temp: 50°C.


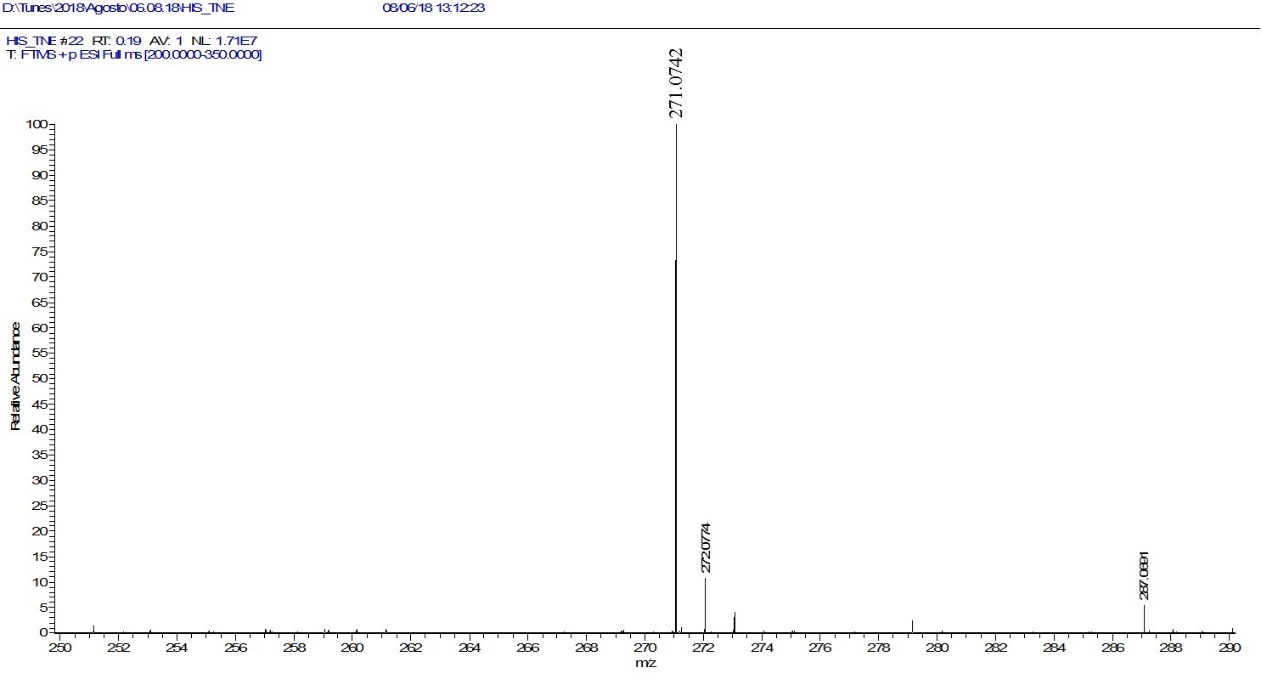


**Fig. S6**. HRMS-ESI spectrum of Michael adduct [M+H]+ at m/z 271.0742, using Bmim[His] as catalyst under our kinetics experimental conditions.


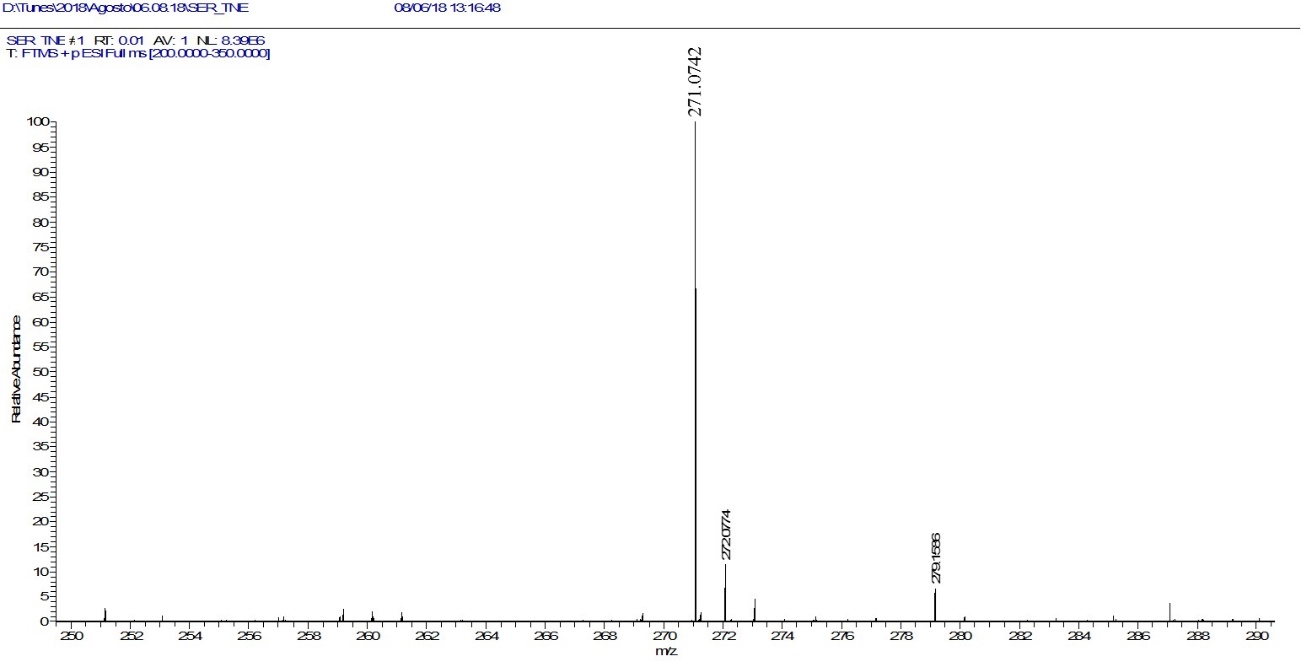


**Fig. S7.** HRMS-ESI spectrum of Michael adduct [M+H]+ at m/z 271.0742, using Bmim[Ser] as catalyst under our kinetics experimental conditions.


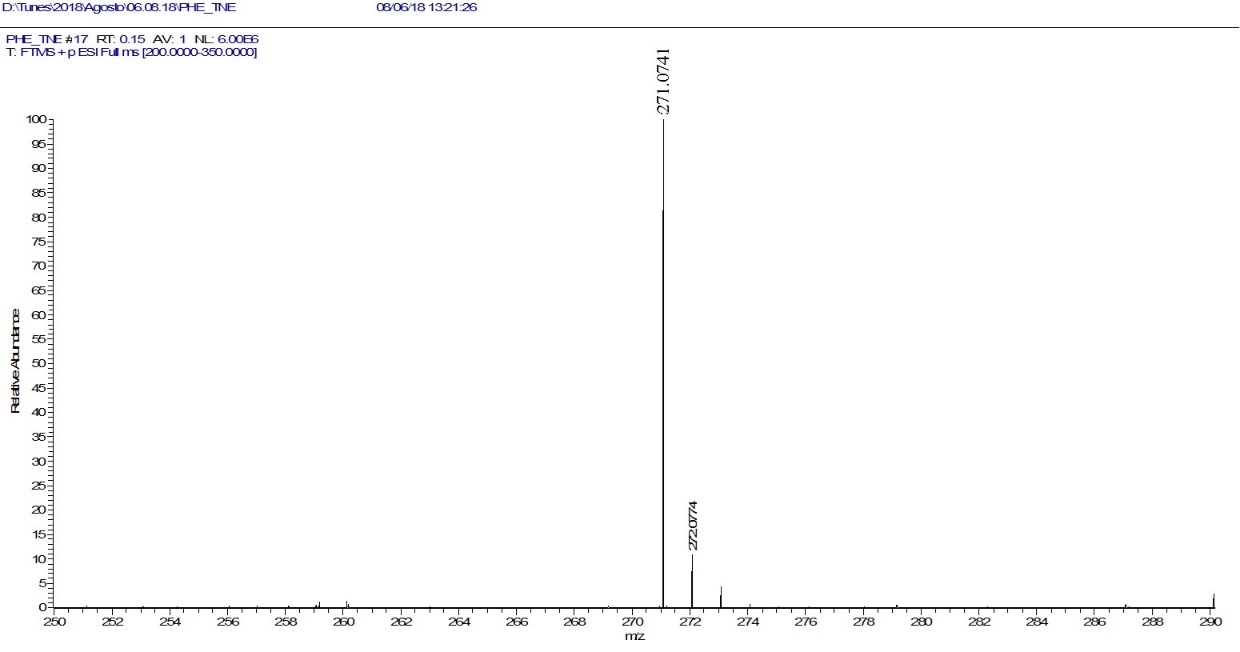


**Fig. S8**. HRMS-ESI spectrum of Michael adduct [M+H]+ at m/z 271.0741, using Bmim[Phe] as catalyst under our kinetics experimental conditions.


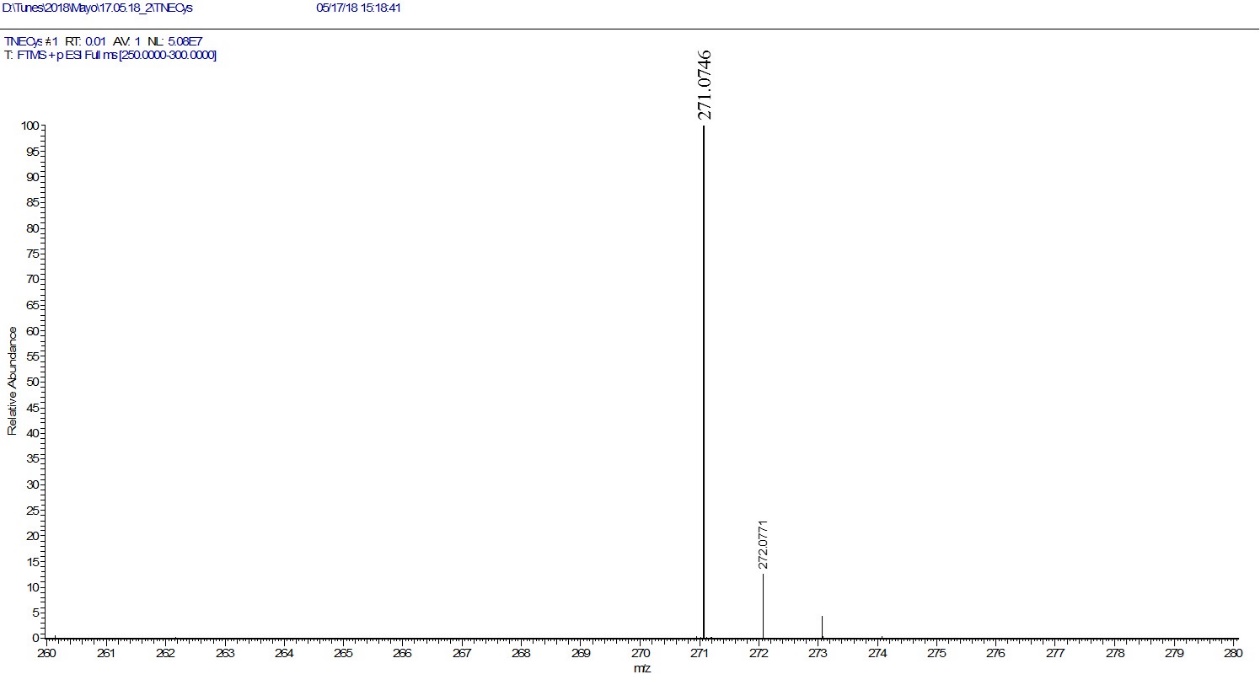


**Fig. S9**. HRMS-ESI spectrum of Michael adduct [M+H]+ at m/z 271.0746, using Bmim[Ala] as catalyst under our kinetics experimental conditions.

**Table S1**. Pseudo-first-order rate constants (*k*obsd) for the reaction of **1** (5×10-6 M) with L-Cys (5×10-5-5.5×10-3 M) at 25ºC ± 0.1.

| **105 [L-Cys]/M** | **102 *k*obsd (s-1)** |
| --- | --- |
| 4.98 | 0.16 |
| 7.56 | 0.20 |
| 14.9 | 0.40 |
| 19.9 | 0.54 |
| 24.9 | 0.70 |
| 29.9 | 0.95 |
| 34.8 | 1.16 |
| 39.8 | 1.51 |
| 50.0 | 1.90 |
| 100 | 3.40 |
| 150 | 5.20 |
| 199 | 6.92 |
| 298 | 10.0 |
| 348 | 11.7 |
| 398 | 12.9 |
| 547 | 17.5 |

Pseudo first-order rate constants were reproducible within a ± 5%

**Table S2.**  Pseudo-first-order rate constants (*k*obsd) for the reaction of **1** (5×10-5 M) with L-Cys (5×10-4 M) using Bmim[AA]s (5×10-6-3×10-5 M) as catalyst at 25ºC ± 0.1.

| Bmim[Ala] | Bmim[Phe] | Bmim[Asn] |
| --- | --- | --- |
| | 106[cat]/M | 102*k*obsd/s-1 | | --- | --- | | 0.00 | 1.90 | | 6.12 | 2.34 | | 12.2 | 3.31 | | 18.4 | 4.74 | | 24.5 | 5.28 | | 30.6 | 6.02 | | | 106[cat]/M | 102*k*obsd/s-1 | | --- | --- | | 0.00 | 1.90 | | 5.00 | 2.87 | | 10.0 | 3.30 | | 15.0 | 3.96 | | 20.0 | 4.76 | | 25.0 | 5.53 | | 30.0 | 5.91 | | | 106[cat]/M | 102*k*obsd/s-1 | | --- | --- | | 0.00 | 1.90 | | 5.01 | 2.48 | | 10.0 | 2.86 | | 15.0 | 3.51 | | 20.0 | 4.24 | |

| Bmim[Ser] | Bmim[Met] | Bmim[Gly] |
| --- | --- | --- |
| | 106[cat]/M | 102*k*obsd/s-1 | | --- | --- | | 0.00 | 1.90 | | 4.97 | 2.45 | | 9.95 | 2.87 | | 14.9 | 3.70 | | 19.9 | 4.17 | | 24.9 | 4.62 | | 29.8 | 5.10 | | | 106[cat]/M | 102*k*obsd/s-1 | | --- | --- | | 4.97 | 1.63 | | 9.94 | 2.03 | | 14.9 | 2.49 | | 19.9 | 3.01 | | 24.8 | 3.57 | | 29.8 | 4.40 | | | 106[cat]/M | 102*k*obsd/s-1 | | --- | --- | | 4.95 | 1.80 | | 9.91 | 2.29 | | 14.9 | 2.49 | | 19.8 | 2.84 | | 24.8 | 3.36 | |

| Bmim[His] | Bmim[Pro] |
| --- | --- |
| | 106[cat]/M | 102*k*obsd/s-1 | | --- | --- | | 0.00 | 1.90 | | 4.96 | 2.85 | | 9.92 | 3.81 | | 14.9 | 4.40 | | 19.9 | 5.40 | | 24.8 | 6.25 | | 29.8 | 6.96 | | | 106[cat]/M | 102*k*obsd/s-1 | | --- | --- | | 0.00 | 1.90 | | 9.60 | 2.23 | | 19.2 | 2.99 | | 24.0 | 3.55 | | 28.8 | 3.81 | |  |  | |  |  | |

Pseudo first-order rate constants were reproducible within a ± 5%

**Table S3.** Pseudo-first-order rate constant (*k*obsd) for the reaction of **1** with L-Cys at 9-32ºC temperature range.

| Temperature 9.8 ± 0.1ºC | Temperature 14.1 ± 0.1ºC | Temperature 19.6 ± 0.1ºC |
| --- | --- | --- |
| | 104[L-Cys]/M | 102*k*obsd/s-1 | | --- | --- | | 9.95 | 1.07 | | 14.9 | 1.27 | | 24.9 | 1.65 | | 29.8 | 1.77 | | 34.8 | 2.12 | | | 104[L-Cys]/M | 102*k*obsd/s-1 | | --- | --- | | 4.97 | 1.38 | | 9.95 | 1.94 | | 14.9 | 2.05 | | 19.9 | 2.68 | | 24.9 | 2.77 | | 29.8 | 3.22 | | 34.8 | 3.33 | | | 104[L-Cys]/M | 102*k*obsd/s-1 | | --- | --- | | 4.97 | 0.94 | | 14.9 | 2.01 | | 19.9 | 3.09 | | 24.9 | 3.35 | | 29.8 | 3.95 | |

| Temperature 16.0 ± 0.1ºC | Temperature 14.1 ± 0.1ºC | Temperature 31.5 ± 0.1ºC |
| --- | --- | --- |
| | 106[BmimMet]/M | 102*k*obsd/s-1 | | --- | --- | | 5.07 | 2.79 | | 10.1 | 2.87 | | 15.2 | 3.02 | | 25.4 | 3.79 | | 30.4 | 4.06 | | | 106[BmimMet]/M | 102*k*obsd/s-1 | | --- | --- | | 5.03 | 3.74 | | 10.1 | 4.30 | | 15.1 | 4.41 | | 20.1 | 4.89 | | 25.2 | 5.52 | | | 106[BmimMet]/M | 102*k*obsd/s-1 | | --- | --- | | 5.07 | 6.87 | | 10.1 | 8.50 | | 15.2 | 10.4 | | 20.3 | 11.8 | | 25.4 | 12.7 | | 30.4 | 13.8 | |

| Temperature 16.4 ± 0.1ºC | Temperature 20.9 ± 0.1ºC | Temperature 32.4 ± 0.1ºC |
| --- | --- | --- |
| | 106[BmimHis]/M | 102*k*obsd/s-1 | | --- | --- | | 4.97 | 2.71 | | 9.94 | 3.60 | | 14.9 | 3.77 | | 19.9 | 4.19 | | 29.8 | 5.88 | | 29.8 | 6.96 | | | 106[BmimHis]/M | 102*k*obsd/s-1 | | --- | --- | | 4.97 | 3.66 | | 9.94 | 5.50 | | 14.9 | 5.54 | | 19.9 | 6.39 | | 24.8 | 6.71 | | | 106[BmimHis]/M | 102*k*obsd/s-1 | | --- | --- | | 2.00 | 7.15 | | 4.00 | 7.63 | | 6.00 | 8.25 | | 8.00 | 8.73 | | 12.0 | 9.60 | |

| Temperature 10.0 ± 0.1 ºC | Temperature 15.1 ± 0.1 ºC | Temperature 19.7 ± 0.1 ºC |
| --- | --- | --- |
| | 106[BmimGly]/M | 102*k*obsd/s-1 | | --- | --- | | 0.00 | 0.76 | | 4.97 | 0.79 | | 9.94 | 0.94 | | 19.9 | 1.33 | | 24.8 | 1.54 | | 29.8 | 1.60 | | | 106[BmimGly]/M | 102*k*obsd/s-1 | | --- | --- | | 0.00 | 1.18 | | 9.94 | 1.63 | | 14.9 | 1.85 | | 19.9 | 2.11 | | 24.8 | 2.29 | | 29.8 | 2.57 | | | 106[BmimGly]/M | 102*k*obsd/s-1 | | --- | --- | | 9.94 | 2.61 | | 14.9 | 2.97 | | 19.9 | 3.11 | | 24.8 | 3.50 | | 29.8 | 3.75 | |

| Temperature 16.5 ± 0.1 ºC | Temperature 20.9 ± 0.1 ºC | Temperature 32.2 ± 0.1 ºC |
| --- | --- | --- |
| | 106[BmimAsn]/M | 102*k*obsd/s-1 | | --- | --- | | 5.03 | 2.67 | | 10.1 | 2.87 | | 15.1 | 2.99 | | 25.2 | 3.76 | | 30.2 | 4.34 | | | 106[BmimAsn]/M | 102*k*obsd/s-1 | | --- | --- | | 4.98 | 3.70 | | 9.95 | 3.55 | | 14.9 | 4.51 | | 19.9 | 4.56 | | 24.9 | 5.15 | | | 106[BmimAsn]/M | 102*k*obsd/s-1 | | --- | --- | | 5.03 | 9.00 | | 10.1 | 9.63 | | 15.1 | 10.5 | | 20.1 | 11.5 | | 30.2 | 13.9 | |

| Temperature 9.0 ± 0.1 ºC | Temperature 14.7 ± 0.1 ºC | Temperature 19.3 ± 0.1 ºC |
| --- | --- | --- |
| | 106[BmimAla]/M | 102*k*obsd/s-1 | | --- | --- | | 0.00 | 0.41 | | 4.93 | 0.56 | | 9.87 | 0.66 | | 19.7 | 0.95 | | 24.7 | 1.08 | | 29.6 | 1.36 | | | 106[BmimAla]/M | 102*k*obsd/s-1 | | --- | --- | | 4.93 | 1.60 | | 9.87 | 1.88 | | 14.8 | 2.13 | | 19.7 | 2.37 | | 29.6 | 2.97 | | | 106[BmimAla]/M | 102*k*obsd/s-1 | | --- | --- | | 0.00 | 1.39 | | 4.96 | 1.70 | | 9.93 | 2.26 | | 14.9 | 2.66 | | 19.9 | 2.81 | | 24.8 | 3.20 | | 29.8 | 3.71 | |

Pseudo first-order rate constants were reproducible within a ± 5%

**Table S4.** Catalytic (*k*cat) and nucleophilic (*k*N) rate constants for the reaction of **1** with L-Cys at 9-32ºC temperature range.

| T(°C)±0.1 | *k*N (M-1s-1) | T(°C)±0.1 | *k*cat (M-1s-1) Bmim[Ala] | T(°C)±0.1 | *k*cat (M-1s-1) Bmim[Gly] |
| --- | --- | --- | --- | --- | --- |
| 9.80 | 3.98 | 9.00 | 301 | 10.0 | 317 |
| 14.1 | 6.55 | 14.7 | 550 | 15.1 | 462 |
| 19.6 | 12.3 | 19.3 | 757 | 19.7 | 525 |
| 25.0 | 31.6 | 25.0 | 1440 | 25.0 | 741 |

| T(°C)±0.1 | *k*cat (M-1s-1) Bmim[Asn] | T(°C)±0.1 | *k*cat (M-1s-1) Bmim[Met] | T(°C)±0.1 | *k*cat (M-1s-1) Bmim[His] |
| --- | --- | --- | --- | --- | --- |
| 16.5 | 656 | 16.0 | 539 | 16.4 | 1190 |
| 20.9 | 784 | 20.9 | 825 | 20.9 | 1410 |
| 25.0 | 1140 | 25.0 | 1090 | 25.0 | 1700 |
| 32.2 | 1970 | 31.5 | 2740 | 32.4 | 2480 |

Pseudo first-order rate constants were reproducible within a ± 5%

**Table S5.** The *k*obsd values obtained in each cycle for thiol-Michael reaction between **1** (5×10-5 M) and L-Cys (7×10-4 M) and Bmim[AA]s (2.5×10-5 M) as catalyst at 25 ± 0.1°C.

| Cycle number | 102*k*obsd (s-1)  Bmim[Ala] | 102*k*obsd (s-1)  Bmim[Asn] | 102*k*obsd (s-1)  Bmim[Pro] | 102*k*obsd (s-1)  Bmim[Met] |
| --- | --- | --- | --- | --- |
| 1 | 8.55 | 5.97 | 4.27 | 5.46 |
| 2 | 7.86 | 5.36 | 4.25 | 5.51 |
| 3 | 7.03 | 5.15 | 4.16 | 5.25 |
| 4 | 6.42 | 4.91 | 4.00 | 4.90 |
| Cycle number | 102*k*obsd (s-1)  Bmim[His] | 102*k*obsd (s-1)  Bmim[Ser] | 102*k*obsd (s-1)  Bmim[Gly] | 102*k*obsd (s-1)  Bmim[Phe] |
| 1 | 9.49 | 5.10 | 4.53 | 5.91 |
| 2 | 9.37 | 4.54 | 4.55 | 5.38 |
| 3 | 8.97 | 4.32 | 4.34 | 5.57 |
| 4 | 8.30 | 4.76 | 4.31 | 5.58 |

Pseudo first-order rate constants were reproducible within a ± 5%

**Table S6.** Nucleophilic rate constant of thiolate (M-1s-1) of the reaction between **1** and L-Cys and L-cysteine derivatives (5×10-4 M) as control in pH: 5.5 at 25 ± 0.1°C.

| Compound | 102*k*obsd (s-1) | 103 | 10-3 (M-1s-1 ) |
| --- | --- | --- | --- |
| L-cysteine | 1.77 | 2.51 | 14.1 |
| N-acetyl-L-cysteine | 0.0548 | 0.10 | 11.0 |
| D-penicillamine | 0.429 | 3.96 | 2.17 |

Pseudo first-order rate constants were reproducible within a ± 5%

**Table S7.** Pseudo-first-order rate constants (*k*obsd) for the reaction of **1** (5×10-5 M) with L-Cys (5×10-4 M) over a pH range of 5.4-6.3 at 25 ± 0.1ºC.

| pH | 102 *k*obsd/s-1 |
| --- | --- |
| 5.43 | 2.07 |
| 5.63 | 2.34 |
| 6.06 | 4.40 |
| 6.17 | 5.09 |
| 6.26 | 5.43 |

Pseudo first-order rate constants were reproducible within a ± 5%
